# Supplementary material for: Helicobacter pylori Infection and Risk of Lung Cancer: A Meta-Analysis
Source: PubMed Central journal article supplement (PMC4437409; doi:10.1155/2013/131869), 2013-02-28
Supplement: 131869.f1.pdf [file 131869.f1.pdf]

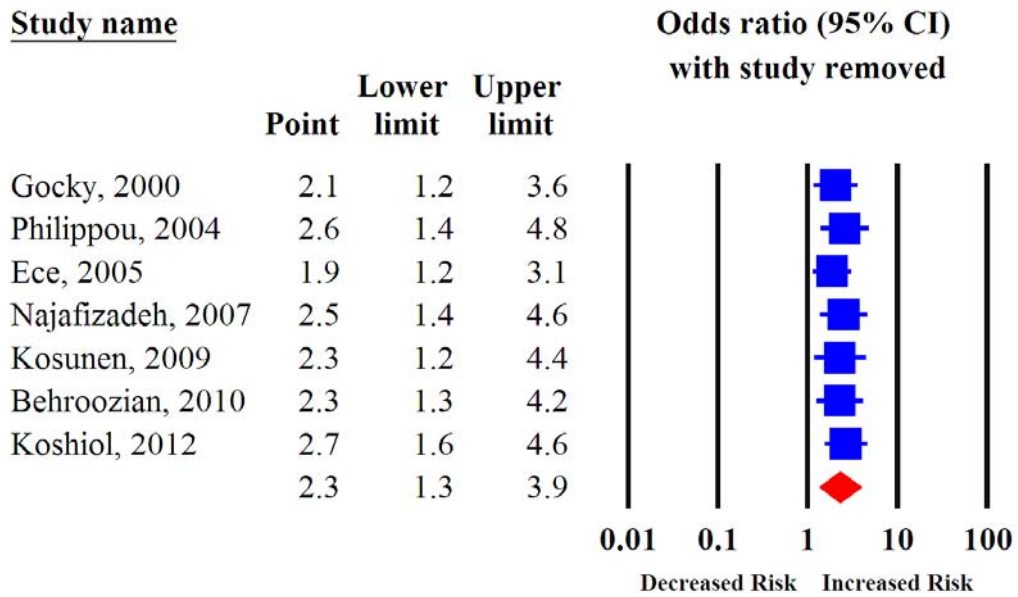

Meta Analysis
